# Supplementary material for: Modeling of pump performance in a water pumping plant
Source: Copernicus journal article supplement (doi:10.5194/dwes-2021-16), 2022-01-20
Supplement: Supplementary file [file dwes-2021-16-AC1-supplement.pdf]

1 **Multiple Linear Regression Analysis of Pumps Performance in Water**  
2 **Pumping Plants**

3 Fouad LAAJINE<sup>1,2</sup>, Mohammed MACHKOR<sup>2</sup>, Driss MAZOUZI<sup>1</sup>

4  
5 <sup>1</sup>R.N.E Laboratory, Multidisciplinary Faculty of Taza, University Sidi Mohamed  
6 Ben Abdellah, Fez, Morocco

7 <sup>2</sup>National Office of Electricity and Drinking Water Morocco

8 Correspondence: Driss MAZOUZI ([driss.mazouzi@usmba.ac.ma](mailto:driss.mazouzi@usmba.ac.ma))

9  
10 **Abstract.** Energy use in water supply systems represents a consequent part of  
11 global energy consumption across all sectors. This consumption is expected to rise,  
12 due to the increasing demand and the recourse to unconventional water resources.  
13 Regarding water utilities, most of their operating costs are related to energy  
14 consumption, especially pumping systems consumption. In this context, the main  
15 objective of this study was to model accurately the energy consumption of pumping  
16 systems in order to optimize the whole water supply system, thus improving its  
17 efficiency, especially in the case of a limited renovation. For this purpose, Multiple  
18 Linear Regression was fitted to model the produced kWh/m<sup>3</sup> ratio according to the  
19 following parameters, active and reactive energies, the daily produced water  
20 volume, the power factor (Cosφ), and the operating time of each pump. The final  
21 model describes accurately the consumption per cubic meter produced (R<sup>2</sup>=0.91).  
22 Therefore, this model could be considered a good estimator for the calculated ratio,  
23 which was close to the experimental one. In addition, this approach considers the  
24 system's behavior while most of the comparable studies focus on the pump  
25 scheduling problem estimator for the calculated ratio which was close to the  
26 experimental one. In addition, this approach considers the real-time-data behavior  
27 while most of the comparable studies focus on the pump scheduling problem.

28  
29 **Key Words:** energy efficiency, linear multiple regression, pumping systems, water  
30 Supply.

31

32

33

34

35

## 36 **1. Introduction**

37 In the upcoming decades, water demand is forecasted to significantly increase up to  
38 35% in 2050 (UN-Water 2020). Therefore, energy needs that are related to the water  
39 pumping and distribution processes could contribute to the expected increase in  
40 energy demand (EIA 2019). Indeed, several studies have concluded that the energy  
41 consumption related to these processes accounts for 7% of the total energy used  
42 across the globe (Coelho et al., 2014). His share is expected to get bigger due to the  
43 increasing distances between resources and populations, especially in water-scarce  
44 countries, and the growing consumption per capita due to the industrialization and  
45 improvement of living standards.

46 To reach the sixth Sustainable Development Goal (SDG6) that aims to  
47 generalize the access to drinking water supply, the water production cost mustn't  
48 impact its price which should stay affordable to the population. Therefore,  
49 production costs should be reduced via the control of energy consumption which is  
50 typically the largest marginal cost for the production (Helena et al., 2017).

51 Pumping processes consume the largest fraction of total energy (Plappally and  
52 Lienhard, 2012). The pumps consumption often presents 80% to 90% of the total  
53 energy consumption (Sarbu, 2016). However, this consumption may depend on  
54 many factors such as surface water or ground water, transport differences, flat or  
55 mountain regions, etc (Rothausen and Conway, 2011) (Plappally and Lienhard,  
56 2012). Thus, by achieving energy efficiency improvements measures, we may  
57 reduce this consumption by 25% (Moreira, et al., 2013). In this context, few studies  
58 were interested in modeling pumping systems and evaluated the influence of  
59 parameters such as the aging of the components, which can reduce the performance  
60 of the pump by up to 12% (Durmus, et al., 2008).

61 Many factors impact the overall energy efficiency of a water pumping system.  
62 One important factor is the operating point which should be as close as possible to  
63 the maximum energy efficiency region (Carravetta, et al., 2020). Another factor is  
64 the age of the system, especially the pumps which can lose 1.5% of their efficiency  
65 every year (Zhou et al., 2021). Many attempts have been made to address the subject

66 of pumping optimization using different approaches to optimize either energy  
67 consumption or the overall cost of energy. To optimize the energy consumption, a  
68 model based on ant colony was utilized (Ostfeld and Tabultzev, 2008) to provide an  
69 effective model that minimizes the design and the operating costs. This model act on  
70 parameters such as: the diameters of the pipes, the pumping station's maximum  
71 power, and the tank's storage. Another work targeting the minimization of energy  
72 consumption (Giustolisi O et al., 2012) used a multiobjective strategy to minimize  
73 losses by controlling pressure in the water distribution system and thus minimizing  
74 the energy consumption.

75 On the other hand, various studies have focused on optimizing the operation of  
76 the existing water systems by using deterministic methods such as Dynamic  
77 Programming (Fallside and Perry, 1975) which worked on minimizing the energy  
78 cost by load shifting using a hierarchical optimization to reduce the problem to 10  
79 control parameters. Given the difficulty of the deterministic approach, different  
80 metaheuristic methods were developed, the widely used among them is Genetic  
81 Algorithms (Wu et al., 2014) which used evolutionary computation to maximize the  
82 efficiency of a system consisting of 2 pumps. Although these efforts employ  
83 evolutionary optimization techniques. However, in literature, particular attention has  
84 been paid to the applicability of linear regression (Puleo et al., 2014) and multiple  
85 linear regression (Adamowski et al., 2012) to the pumping scheduling optimization  
86 problem.

87 This work targets the pumping system of the Bab Louta drinking water  
88 production located in the province of Taza, Morocco. In this perspective, a multiple  
89 linear regression (MLR) was fitted to model the produced kWh/m<sup>3</sup> ratio according to  
90 the input parameters by using real-Time-data.

91

## 92 **2. Materials and methods**

93 Conventional water supply systems (WSS) consist of sets of structures and  
94 facilities providing products with a suitable quantity and quality for domestic and

95 industrial use (Luna et al., 2019). To develop energy and hydraulic model, WSS  
96 systems should be evaluated in terms of mass and energy (Figure 1).

97

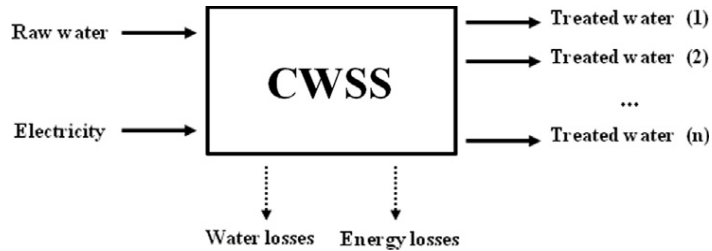

98

99 **Figure 1:** Energy and Hydraulic flows in a WSS (Vilanova, et al., 2014).

100 There are various methods to enhance energy efficiency in WSS. These  
101 methods are ranging from leakages control through simple monitoring operations to  
102 massive investments by reviewing the design of the infrastructures, equipment  
103 upgrade, pump system optimization, and real-time control. These Methods were  
104 classified into 3 major sub-categories in Figure 2 (Shankar, et al., 2016).

105

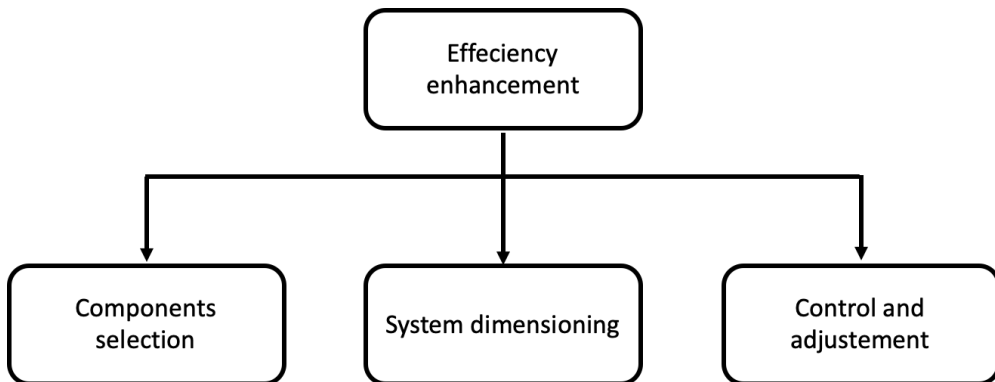

106

107 **Figure 2:** Efficiency enhancement opportunities in WSS.

108

## 109 2.1 Study area and description of the drinking water production system

110

111 The province of Taza is located in the center North of Morocco and it is one of  
112 the 9 provinces of the region of Fez-Meknes with a population of roughly 530 000  
113 inhabitants (Morocco 2014). The water treatment plant of Tahla provides a large  
114 population of the province, mainly the urban areas. It is situated 60 km from the city  
115 of Taza. The plant treats the raw water of the Bab Louta reservoir.

116 The production system consists of a pumping station SP0 for raw water, a water  
117 treatment plant then another pumping station of SP3 to reach the city of Taza, which  
118 is the chief town of the province.

119

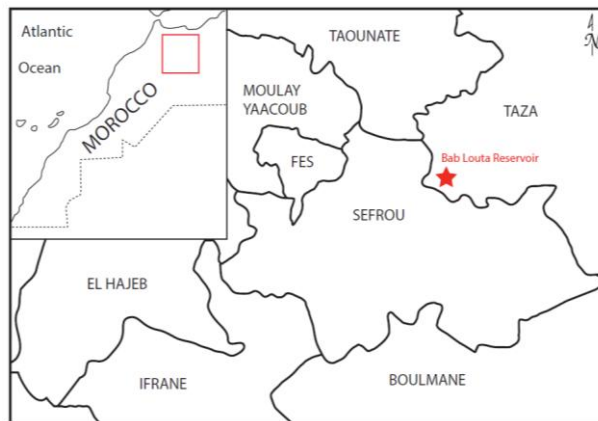

120

121 **Figure 3:** Location of the Bab Louta reservoir.

122

## 123 2.2 Description of the pumping station

124

125 The pumping station SP0 is located about 3km from the reservoir. It is  
126 responsible for overcoming the difference in altitude between the raw water intake  
127 and the water treatment plant. The water is taken by gravitation from the reservoir to  
128 the pumping station SP0 through a pipe of a nominal diameter (ND) of 700 mm  
129 which converge to a diameter of 500 mm just before reaching the SP0. Then, the  
130 water is pumped through a pipe of a nominal diameter of 600 mm to a tank destined  
131 to provide the water treatment plant with raw water, it is called RMC0 and having a  
132 capacity of 1000 m<sup>3</sup>, which provides the water treatment plant with raw water  
133 through a pipe of a nominal diameter of 500mm (ONEE 2019).

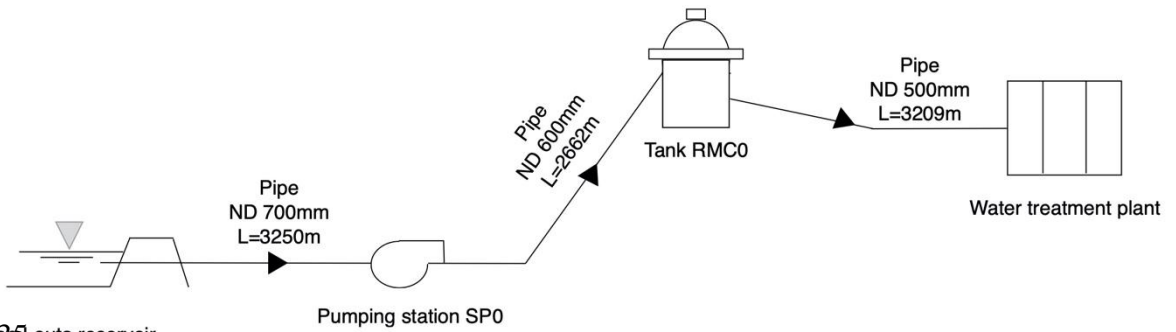

135 Bab Louta reservoir  
 136 **Figure 4:** Location of the Bab Louta reservoir.

137 The pumping station, the object of the current study, is situated at an altitude of  
 138 498.20 m and tank RMC0 is situated at an altitude of 737.80m. SP0 consists of four  
 139 pumps (Figure 5) with a flow of 457 m<sup>3</sup>/h each and a manometric pressure of 209 m.  
 140 They are manufactured by the company HIDROTECAR powered by an electric  
 141 motor which is manufactured by LEROY SOMER with a nominal power of 455 kW  
 142 (ONEE, 2019).

143

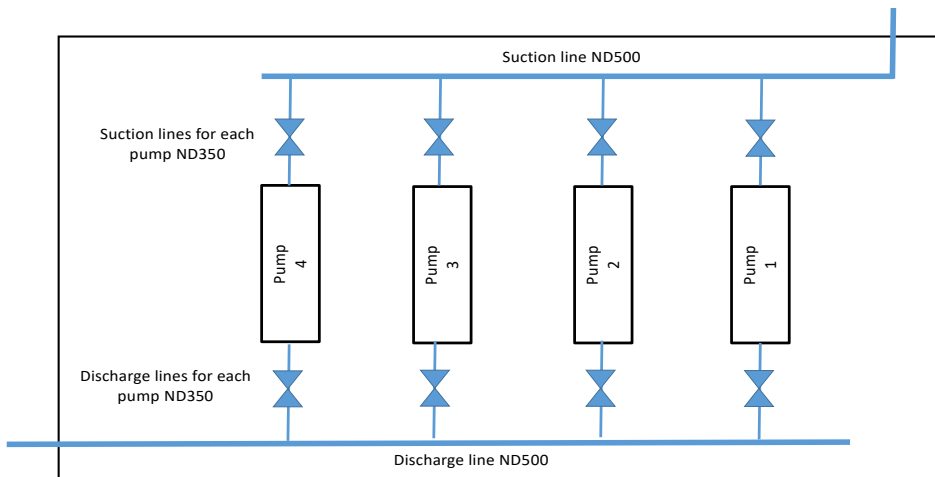

144  
 145 **Figure 5:** Hydromechanical scheme of the pumping station SP0.

146  
 147 2.3 Experimental procedure

148

149 To obtain a reliable model of our system, measurements of the key parameters  
150 influencing this system were conducted. These measurements were taken in the  
151 period between January 2015 and December 2018 daily for the parameters:

- 152 • P: the active energy consumed by the pumping station (measured by a  
153 wattmeter),
- 154 • Q: the reactive energy consumed by the pumping station (measured by a  
155 wattmeter),
- 156 • V: the daily produced volume (measured by an electromagnetic  
157 flowmeter),
- 158 •  $\text{Cos}\varphi$ : the power factor,
- 159 • HMG1: the pump operating time “1”,
- 160 • HMG2: the pump operating time “2”,
- 161 • HMG3: the pump operating time “3”,
- 162 • HMG4: the pump operating time “4”.

163

## 164 2.4 Modelling

165

166 This study aimed to use Multiple Linear Regression analysis to predict an output  
167 from a range of inputs. MLR model with multiple input variables can be expressed  
168 as follows (Longo et al., 2016):

169

$$170 \quad Y = \beta_0 + \beta_1 X_1 + \beta_2 X_2 + \dots + \beta_n X_n \quad \text{Eq 1}$$

171

172 where :

- 173 • Y is the output variable;
- 174 •  $\beta_i$  are the regression parameters;
- 175 •  $X_i$  are the input variables.

176

177 In order to assess the influence of the included parameters on the cubic meters  
178 ratio produced by the pumping station, the following parameters were considered:

179 the active energy (EP), the reactive energy (EQ), the daily produced volume (V), the  
180 power factor (Cosφ), and the operating time of each pump (HMGi).

181 The effect of eight variables on the produced Kwh/m<sup>3</sup> ratio was evaluated (Table  
182 1). Of note, 1388 experiments were conducted during 4 years.

183

184 **Table 1:** Problem characteristics

| Objective of the study     | The effect of the variables on the ratio<br>KWh/m <sup>3</sup> |
|----------------------------|----------------------------------------------------------------|
| Number of Variables        | 8                                                              |
| Number of experiments      | 1388                                                           |
| Number of the coefficients | 8                                                              |
| Number of responses        | 1                                                              |

185

186 **Table 2:** Measurements Summary

|                    | E <sub>P</sub> (kWh) | E <sub>Q</sub> (kVar) | Cosφ | Production (m <sup>3</sup> ) | HMG1 (m) | HMG2 (m) | HMG3 (m) | HMG4 (m) | Ratio (kWh/m <sup>3</sup> ) |
|--------------------|----------------------|-----------------------|------|------------------------------|----------|----------|----------|----------|-----------------------------|
| Mean               | 14 837.47            | 8 339.58              | 0.87 | 18 181.40                    | 7.95     | 7.63     | 10.43    | 9.01     | 0.82                        |
| Standard deviation | 9 158.63             | 8 529.85              | 0.05 | 5 081.13                     | 8.90     | 5.88     | 11.51    | 8.85     | 0.43                        |

187

188 In Table 2 there is a preview of descriptive statistics of the eight parameters, the  
189 mean and the standard deviation.

190 In the graphs below the distribution of the parameters is represented.

191

192



A

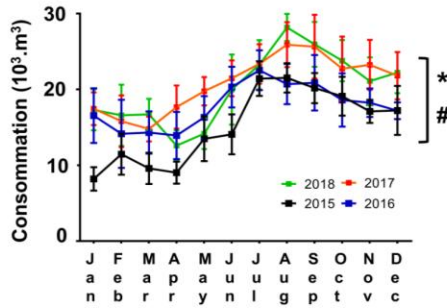

B

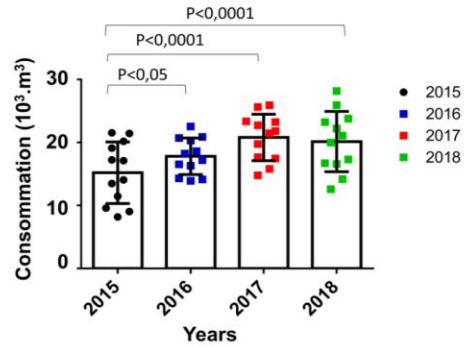

193

194 **Figure 6:** Representation the dataset collected of the variation of the consumptions through  
 195 the months during period 2015 and 2018, (A) consumption variation through the months (\*:  
 196  $p < 0.05$ , consumption variation through the years; #:  $p < 0.05$ , consumption variation through  
 197 the months), (B) consumption variation through the years ( $P < 0.05$  is considered as  
 198 statistically significant. Each point represents the consumption average of a given month  
 199 during the year).

200

201

202 The dataset collected of the water production across the year for each year from  
 203 2015 to 2018 presented in figure 6-A, and it the trend shows that clearly  
 204 demonstrates a higher production which reflects a higher consumption during the  
 205 summer months in province of Taza. On the other hand, figure 6-B shows the  
 206 evolution of the production through the years 2015 to 2018 and it has also the same  
 207 increasing trend due to the continuous commissioning of new networks leading to a  
 208 growing number of consumers.

208

### 209 3. Results and discussion

#### 210 3.1 Statistical interpretation

211

212

213

From the correlation matrix (Table 3), it was found that the studied variables are strongly correlated:

- 214 • The active energy consumed by the pumping station was dependent on the  
215 production, reactive energy, pumps operating hours (4;1), power factor  
216 ( $\text{Cos}\phi$ ), HMG2, and HMG3 respectively.
- 217 • The reactive energy consumed is highly was dependents on the production,  
218 active energy,  $\text{Cos}\phi$ , pumps operating hours (4;1;2;3) respectively.
- 219 •  $\text{Cos}\phi$  was dependent on the reactive energy, the production, active energy,  
220 pumps operating hours (4;1;3;2) respectively.
- 221 • Production was dependent on the active energy, the reactive energy pumps  
222 operating hours (4;1;2;3).

**Table 3:** Correlation Matrice

| Variable     | Correlations (MATRICE CR without outliers)<br>Marked correlations are significant at $p < 0,05000$<br>N=1388 (Case wise deletion of missing data) |           |               |           |           |           |           |           |           |               |               |
|--------------|---------------------------------------------------------------------------------------------------------------------------------------------------|-----------|---------------|-----------|-----------|-----------|-----------|-----------|-----------|---------------|---------------|
|              | Means                                                                                                                                             | Std. Dev. | P             | Q         | Cos phi   | Prod      | HMG1      | HMG2      | HMG3      | HMG4          | Ratio         |
| <b>P</b>     | -0.022423                                                                                                                                         | 0.487229  | 1.000000      | 0.883071  | -0.190305 | 0.939746  | 0.333340  | 0.202424  | 0.169873  | 0.625872      | 0.463030      |
| <b>Q</b>     | -0.027636                                                                                                                                         | 0.345041  | 0.883071      | 1.000000  | -0.585775 | 0.883506  | 0.332525  | 0.170169  | 0.170505  | 0.612964      | 0.298339      |
| <b>Cosφ</b>  | 0.026763                                                                                                                                          | 0.761882  | -<br>0.190305 | -0.585775 | 1.000000  | -0.316528 | -0.197066 | 0.024943  | -0.076562 | -0.271961     | 0.193819      |
| <b>prod</b>  | 0.000741                                                                                                                                          | 0.973866  | 0.939746      | 0.883506  | -0.316528 | 1.000000  | 0.340309  | 0.222533  | 0.175107  | 0.613597      | 0.150594      |
| <b>HMG1</b>  | -0.001400                                                                                                                                         | 1.002171  | 0.333340      | 0.332525  | -0.197066 | 0.340309  | 1.000000  | -0.164919 | -0.016355 | 0.236341      | 0.111733      |
| <b>HMG2</b>  | -0.001865                                                                                                                                         | 0.998758  | 0.202424      | 0.170169  | 0.024943  | 0.222533  | -0.164919 | 1.000000  | -0.086627 | -0.141591     | 0.006575      |
| <b>HMG3</b>  | 0.001362                                                                                                                                          | 1.003257  | 0.169873      | 0.170505  | -0.076562 | 0.175107  | -0.016355 | -0.086627 | 1.000000  | 0.074751      | 0.036371      |
| <b>HMG4</b>  | -0.017745                                                                                                                                         | 0.708400  | 0.625872      | 0.612964  | -0.271961 | 0.613597  | 0.236341  | -0.141591 | 0.074751  | 1.000000      | 0.025731<br>5 |
| <b>Ratio</b> | -0.051987                                                                                                                                         | 0.197427  | 0.463030      | 0.298339  | 0.193819  | 0.150594  | 0.111733  | 0.006575  | 0.036371  | 0.025731<br>5 | 1.000000      |

224 From the regression table (Table 4), it was concluded that the factors  
225 influencing the kWh/m<sup>3</sup> ratio in descending order are:

- 226 • Ratio is positively correlated with the active energy consumed by the  
227 pumps;
- 228 • Ratio is negatively correlated with the production;
- 229 • Ratio is positively correlated with Cosφ;
- 230 • Ratio is negatively correlated with the reactive energy consumed by the  
231 pumps;
- 232 • Ratio is positively correlated with the operating hours of pumps 1 and 4.

233

234 **Table 4:** Regression summary for dependent variable

| <b>N=1388</b>    | <b>b*</b> | <b>Std. Err. of b*</b> | <b>B</b>  | <b>Std. Err. of b</b> | <b>t (1379)</b> |
|------------------|-----------|------------------------|-----------|-----------------------|-----------------|
| Intercept        |           |                        | -0.026073 | 0.001608              | -16.2112        |
| Prod             | -2.52837  | 0.026164               | -0.512563 | 0.005304              | -96.6366        |
| HMG <sub>1</sub> | 0.02116   | 0.008985               | 0.004168  | 0.001770              | 2.3546          |
| HMG <sub>2</sub> | 0.01693   | 0.009327               | 0.003346  | 0.001844              | 1.8150          |
| HMG <sub>3</sub> | -0.00080  | 0.008299               | -0.000157 | 0.001633              | -0.0960         |
| HMG <sub>4</sub> | 0.04287   | 0.011275               | 0.011948  | 0.003142              | 3.8023          |
| P                | 2.85701   | 0.043662               | 1.157669  | 0.017692              | 65.4347         |
| Q                | -0.08315  | 0.040932               | -0.047577 | 0.023421              | -2.0314         |
| Cosφ             | 0.09614   | 0.020445               | -0.024913 | 0.005298              | -4.7023         |

235

236 From the variance analysis (Table 5):

- 237 • Regression mean squares was superior to the residual mean squares;
- 238 • The Fischer value is very high;
- 239 • P-value is strictly inferior to 0.05.

240 These results validated our variance analysis.

241

242

243

244

245

246 **Table 5:** Analysis of Variance Table

| Effect          | Analysis of Variance; DV: Ratio |      |              |          |         |
|-----------------|---------------------------------|------|--------------|----------|---------|
|                 | Sums of Squares                 | df   | Mean Squares | F        | p-value |
| <b>Regress.</b> | 49.31283                        | 8    | 6.164104     | 1790.044 | 0.00    |
| <b>Residual</b> | 4.74865                         | 1379 | 0.003444     |          |         |
| <b>Total</b>    | 54.06149                        |      |              |          |         |

247

248 Multiple Linear Regression has shown that most of the experimental results are  
 249 highly adjusted and the model is explanatory, considering the value of  $R^2$  and the  
 250 value standard error estimate which is very low (table 6).

251

252 **Table 6:** Summary statistics

| Statistic                  | Value        |
|----------------------------|--------------|
| R                          | 0.95507172   |
| $R^2$                      | 0.91216198   |
| Adjusted $R^2$             | 0.9116524    |
| Fischer (8.1379)           | 1790         |
| P                          | 0            |
| Standard error of estimate | 0.0586817579 |

253

254 The final model is expressed by the equation below:

255

$$R_{\text{ratio}} = 2.85701 P - 2.52837 \text{ Prod} + 0.09614 Q - 0.08315 \text{ Cos}\varphi + 0.04287 \text{ HMG1} + 0.02116 \text{ HMG2.} \quad \text{Eq 2}$$

257

258

259

### 3.2 Technical Interpretations

260

261

262

263

264

265

From this analysis, this study concluded that in order to improve the ratio per produced cubic meter, a reduction of the active energy consumed by the pumps should be considered. As the function point of the pumps is already set by the system characteristics, only active energy could be reduced by the improvement of the pumps efficiency.

266

267

The ratio is negatively correlated with production means; i.e. there is an economy of scale. It means the most the production increases the least the ratio is.

268

269

The operating hours of the pumps 1 and 4 are positively correlated, which means that more these pumps are used higher more the ratio is higher. Therefore, it

270 is recommended to use the pump 3, and if there is an operation of renovation of the  
271 pumping station, it is recommended to start with upgrading the pumps 1 and 4. In  
272 the event of a new investment, the company can increase the capacity of the RMC0  
273 storage tank which, according to the model, will decrease the significantly the ration  
274 and also allows a load shifting to the off peak hours

275 The model which was elaborated in this study has a standard error of estimate  
276 of 0.05 and due to the lack of previous studies using multiple linear regression, we  
277 compared the results with a previous study involving five data-mining approaches  
278 (Kusiak et al., 2013). This study had for objective to model the energy consumption  
279 in a comparable case of a wastewater pumping station that has 3 pumps that transfer  
280 the wastewater to a treatment plant. Although there are differences between the flow  
281 capacities and the pressure with drinking water supply facilities but the approach  
282 remains the same. The five data mining approaches are the multi-layer, perceptron,  
283 neural network (MLP), the boosted-tree (regression) algorithm (BT), the random-  
284 forest algorithm (RF), the support-vector machine (SVM), and the k-nearest  
285 neighbor algorithm. These approaches had all provided more than 90% of accuracy  
286 which is the case in the model of this study. The benefit of our method goes beyond  
287 the control methods used in most of the optimization approaches which only  
288 provide a method to operate the system in an efficient way but don't account for  
289 other factors such as the aging of the pumps, factors that are crucial when upgrading  
290 the system.

#### 291 **4. Conclusions**

292 A Linear multiple regression was conducted to assess and study the influence of  
293 multiple parameters on the energy consumption ratio per cubic meter water,  
294 involved in a water pumping station.

295 This unique approach has allowed evaluating the real response of the system  
296 relying on data that is measured over a 4 years period. Modelling the ratio will be a  
297 tool to take decisions on which pump should the work be done first. This method  
298 combined with a cash flow analysis, can help to take decisions on establishing  
299 priorities in case of renovations, to change the pumps 1 and 4 with more efficient

300 pumps. The model would be useful when the next renovation will be undertaken by  
301 the office which will conduct a replacement of the pumps in the year 2024.

302 The above findings demonstrate the potential of method for solving real-time  
303 pump scheduling problems in large water distribution systems with many pumps.  
304 This, however, requires further work with other metaheuristic methods such as  
305 Genetic Algorithms before relevant conclusion can be made.

306

307 **Data availability.** The source data used for the illustrations of the cases are  
308 available upon request.

309 **Conflict of interest.** All authors declare no conflicts of interest in this paper.

310

311

312

313

314

315

316

317

318

319

320

321

322

323

324

325

326 **References**

- 327 Adamowski, J., Fung Chan, H., Prasher, S. O., Ozga-Zielinski, B., Sliusarieva, A.:  
328 Comparison of multiple linear and nonlinear regression, autoregressive integrated  
329 moving average, artificial neural network, and wavelet artificial neural network methods  
330 for urban water demand forecasting in Montreal, Canada WATER RESOURCES  
331 RESEARCH, VOL. 48, W01528, doi:10.1029/2010WR009945, 2012
- 332 Kusiak, A., Zeng, Y ., Zhang, Z.: Modeling and analysis of pumps in a wastewater treatment  
333 plant: A data-mining approach, Engineering Applications of Artificial Intelligence., 26,  
334 7, 1643-1651, 2013.
- 335 Shankar, A., Umashankar, V. K., Paramasivam, S., Norbert., S. H.: A comprehensive review  
336 on energy efficiency enhancement initiatives in centrifugal pumping system, Applied  
337 Energy, Elsevier, 181, C, 495-513, 2016
- 338 Carravetta, A.; Giugni, M.; Malavasi, S.: Application of Innovative Technologies for Active  
339 Control and Energy Efficiency in Water Supply Systems. Water, 12, 3278.  
340 <https://doi.org/10.3390/w12113278>, 2020
- 341 Coelho, B. and Andrade-Campos, A.: Efficiency achievement in water supply systems-A  
342 review, Renewable and Sustainable Energy Reviews, 30, C, 59-84, 2014.
- 343 Moreira, D. F., Ramos, H. M.: Energy Cost Optimization in a Water Supply System Case  
344 Study, Journal of Energy, vol. 2013, Article ID 620698, 9 pages.,  
345 <https://doi.org/10.1155/2013/620698>, 2013
- 346 Durmus, K. E., Alptekin, Y., Suleyman Yigit, K., Kilic, F. C., Salih Eren, A., Cenk Celik.:  
347 Energy efficiency in pumps, Energy Conversion and Management, 49, 6, 1662-1673,  
348 2008.
- 349 Fallside, F., Perry, P.F.: Hierarchical optimization of a water supply network, Proceedings of  
350 the Institution of Electrical Engineers, 122, 2, 202-208, 1975.
- 351 Giustolisi, O., Laucelli, D., Berardi, L.: Operational optimization: water losses versus energy  
352 costs, J. Hydraulic Eng. ASCE., 139, 4, 410-423, 2012.
- 353 Helena, M-J., Nargiz, S., Dragan, S.: Lost in optimisation of water distribution systems? A  
354 literature review of system operation, Environmental Modelling & Software, 93, 210-  
355 251, <https://doi.org/10.1016/j.envsoft.2017.02.009>, 2017



356 Morocco, 2014.: High Commission for Planning (Morocco). Morocco Population and  
357 Housing Census 2014, [http://ghdx.healthdata.org/record/morocco-population-and-](http://ghdx.healthdata.org/record/morocco-population-and-housing-census, 2014)  
358 [housing-census, 2014](http://ghdx.healthdata.org/record/morocco-population-and-housing-census, 2014).

359 EIA, 2019.: International Energy Outlook 2019, <https://www.eia.gov/outlooks/ieo, 2019>.

360 Longo, S-A., Benedetto, M-B., Michael, C., Antonio,C., Andreas, F., Francesco, L., Juan,  
361 M. M-I., Miguel, S., Ana, H. A.: Monitoring and diagnosis of energy consumption in  
362 wastewater treatment plants. A state of the art and proposals for improvement, Applied  
363 Energy, Elsevier, 179, C, 1251-1268, 2016.

364 Luna, T., Ribau, J., Figueiredo, D., Alves. R: Improving energy efficiency in water supply  
365 systems with pump scheduling optimization, Journal of Cleaner Production 213, 342-  
366 356, 2019.

367 Nogueira, V., Mateus, R., Perrella, B., José, A.: Energy and hydraulic efficiency in  
368 conventional water supply systems, Renewable and Sustainable Energy Reviews, 30, C,  
369 701-714, 2014.

370 ONEE-“National Office of Electricity and Drinking Water Morocco”-(2019) .: Exploitation  
371 report, 2019.

372 Ostfeld, A. and Tubaltzev, A.: Ant Colony Optimization for Least Cost Design and  
373 Operation of Pumping and Operation of Pumping Water Distribution Systems. Journal of  
374 Water Resources Planning and Management, 134, 107-118.  
375 [http://dx.doi.org/10.1061/\(ASCE\)0733-9496\(2008\)134:2\(107\), 2008](http://dx.doi.org/10.1061/(ASCE)0733-9496(2008)134:2(107), 2008)

376 Puleo, V., Morley, M., Freni, G., Savić, D., Multi-stage linear programming optimization for  
377 pump scheduling Procedia Engineering, 70, 1378-1385, 2014.

378 Plappally, A.K., Lienhard, J.H. V.: Energy requirements for water production, treatment,  
379 end use, reclamation, and disposal Renewable and Sustainable Energy Reviews 16,  
380 4818–4848, 2012.

381 Rothausen, S., Conway, D. Greenhouse-gas emissions from energy use in the water sector.  
382 Nature Clim Change 1, 210–219, <https://doi.org/10.1038/nclimate1147, 2011>

383 Sarbu, I.: A Study of Energy Optimisation of Urban Water Distribution Systems Using  
384 Potential Elements. Water, 8, 593, 1-19. <https://doi.org/10.3390/w8120593, 2016>

- 385 Vilanova, N., Ricardo, M., Balestieri, P., Antônio, J.: Energy and hydraulic efficiency in  
386 conventional water supply systems, *Renewable and Sustainable Energy Reviews*,  
387 Elsevier, 30, C, 701-714, 2014.
- 388 Wu, P., Lai, Z., Wu, D., Wang, L.: Optimization research of parallel pump system for  
389 improving energy efficiency, *Journal of Water Resources Planning and Management*,  
390 141, 8, 2015.
- 391 UN-Water 2020 World Water Development Report,  
392 <https://www.unwater.org/publications/world-water-development-report-2020>, 2020.
- 393 Zhou, Y., Lee, E. W. M., Wong, L. T., & Mui, K. W.: Environmental evaluation of pump  
394 replacement period in water supply systems of buildings. *Journal of Building*  
395 *Engineering*, 40, 102750, 2021.
