# Supplementary material for: Modeling of pump performance in a water pumping plant
Source: Copernicus journal article supplement (doi:10.5194/dwes-2021-16), 2022-01-20
Supplement: Supplementary file [file dwes-2021-16-AC2-supplement.pdf]

# Multiple Linear Regression Analysis of Pumps Performance in Water Pumping Plants

Fouad LAAJINE<sup>1,2</sup>, Mohammed MACHKOR<sup>2</sup>, Driss MAZOUZI<sup>1</sup>

<sup>1</sup>R.N.E Laboratory, Multidisciplinary Faculty of Taza, University Sidi Mohamed Ben Abdellah, Fez, Morocco

<sup>2</sup>National Office of Electricity and Drinking Water Morocco

Correspondence: Driss MAZOUZI ([driss.mazouzi@usmba.ac.ma](mailto:driss.mazouzi@usmba.ac.ma))

**Abstract.** Energy use in water supply systems represents a consequent part of global energy consumption across all sectors. This consumption is expected to rise, due to the increasing demand and the recourse to unconventional water resources. Regarding water utilities, most of their operating costs are related to energy consumption, especially pumping systems consumption. In this context, the main objective of this study was to model accurately the energy consumption of pumping systems in order to optimize the whole water supply system, thus improving its efficiency, especially in the case of a limited renovation. For this purpose, Multiple Linear Regression was fitted to model the produced kWh/m<sup>3</sup> ratio according to the following parameters, active and reactive energies, the daily produced water volume, the power factor (Cosφ), and the operating time of each pump. The final model describes accurately the consumption per cubic meter produced with R-square statistic reaching 0.91 and value standard error is close to 5% were found. Therefore, this model could be considered a good estimator for the calculated ratio, which was close to the experimental one. In addition, this approach considers the system's behavior while most of the comparable studies focus on the pump scheduling problem estimator for the calculated ratio which was close to the experimental one. In addition, this approach considers the real-time-data behavior while most of the comparable studies focus on the pump scheduling problem.

**Key Words:** Energy efficiency, multiple linear regression, pumping systems, water supply system.

37 **1. Introduction**

38 In the upcoming decades, water demand is forecasted to significantly increase up to  
39 35% in 2050 (UN-Water 2020). Therefore, energy needs that are related to the water  
40 pumping and distribution processes could contribute to the expected increase in  
41 energy demand (EIA 2019). Indeed, several studies have concluded that the energy  
42 consumption related to these process accounts for 7% of the total energy used across  
43 the globe (Coelho et al., 2014). His share is expected to get bigger due to the  
44 increasing distances between resources and populations, especially in water-scarce  
45 countries, and the growing consumption per capita due to the industrialization and  
46 improvement of living standards.

47 To reach the sixth Sustainable Development Goal (SDG6) that aims to  
48 generalize the access to drinking water supply, the water production cost mustn't  
49 impact its price which should stay affordable to the population. Therefore,  
50 production costs should be reduced via the control of energy consumption which is  
51 typically the largest marginal cost for the production (Helena et al., 2017).

52 Pumping processes consume the largest fraction of total energy (Plappally and  
53 Lienhard, 2012). The pumps consumption often presents 80% to 90% of the total  
54 energy consumption (Sarbu, 2016). However, this consumption may depend on  
55 many factors such as surface water or ground water, transport differences, flat or  
56 mountain regions, etc (Rothausen and Conway, 2011) (Plappally and Lienhard,  
57 2012). Thus, by achieving energy efficiency improvements measures, we may  
58 reduce this consumption by 25% (Moreira, et al., 2013). In this context, few studies  
59 were interested in modeling pumping systems and evaluated the influence of  
60 parameters such as the aging of the components, which can reduce the performance  
61 of the pump by up to 12% (Durmus, et al., 2008).

62 The improvement of the efficiency of the pumping has always been an  
63 important part. Since many specific factors impact the overall energy efficiency of a  
64 water pumping system such as surface water or ground water, transport differences,  
65 flat or mountain region... One important factor is the operating point which should  
66 be as close as possible to the maximum energy efficiency region (Carravetta, et al.,

67 2020). Another factor is the age of the system, especially the pumps which can lose  
68 1.5% of their efficiency every year (Zhou et al., 2021). Many attempts have been  
69 made to address the subject of pumping optimization using different approaches to  
70 optimize either energy consumption or the overall cost of energy. To optimize the  
71 energy consumption, a model based on ant colony was utilized (Ostfeld and  
72 Tabultzev, 2008) to provide an effective model that minimizes the design and the  
73 operating costs. This model act on parameters such as: the diameters of the pipes,  
74 the pumping station's maximum power, and the tank's storage. Another work  
75 targeting the minimization of energy consumption (Giustolisi O et al., 2012) used a  
76 multiobjective strategy to minimize losses by controlling pressure in the water  
77 distribution system and thus minimizing the energy consumption.

78 On the other hand, various studies have focused on optimizing the operation of  
79 the existing water systems by using deterministic methods such as Dynamic  
80 Programming (Fallside and Perry, 1975) which worked on minimizing the energy  
81 cost by load shifting using a hierarchical optimization to reduce the problem to 10  
82 control parameters. Given the difficulty of the deterministic approach, different  
83 metaheuristic methods were developed, the widely used among them is Genetic  
84 Algorithms (Wu et al., 2014) which used evolutionary computation to maximize the  
85 efficiency of a system consisting of 2 pumps. Although these efforts employ  
86 evolutionary optimization techniques. However, in literature, particular attention has  
87 been paid to the applicability of linear regression (Puleo et al., 2014) and multiple  
88 linear regression (Adamowski et al., 2012) to the pumping scheduling optimization  
89 problem.

90 This work introduces a method of using multiple regression method to analyze  
91 the key factors affecting the efficiency of the pumping for drinking water  
92 production. Hence, this paper presents the results targets the pumping system of the  
93 Bab Louta drinking water production located in the province of Taza, Morocco. In  
94 this perspective, a multiple linear regression (MLR) was fitted to model the  
95 produced kWh/m<sup>3</sup> ratio according to the input parameters by using real-Time-data

96 such as the active energy and reactive energy consumed by the pumping station, the  
97 daily produced volume, the power factor and the pump operating time.

98

## 99 2. Materials and methods

100 Conventional water supply systems (WSS) consist of sets of structures and facilities  
101 providing products with a suitable quantity and quality for domestic and industrial  
102 use (Luna et al., 2019). To develop energy and hydraulic model, WSS systems  
103 should be evaluated in terms of mass and energy (Figure 1).

104

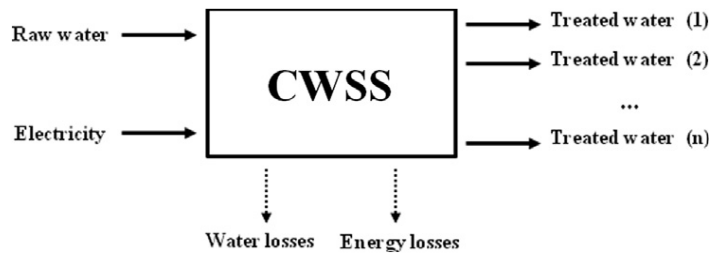

105

106 **Figure 1:** Schematic diagram of the energy and hydraulic flows in a WSS (Vilanova, et al.,  
107 2014).

108 There are various methods to enhance energy efficiency in WSS. These methods  
109 are ranging from leakages control through simple monitoring operations to massive  
110 investments by reviewing the design of the infrastructures, equipment upgrade,  
111 pump system optimization, and real-time control. These Methods were classified  
112 into 3 major sub-categories is shown in Figure 2 (Shankar, et al., 2016). These  
113 factors affecting system efficiency, and formulate targeted improvement plans.

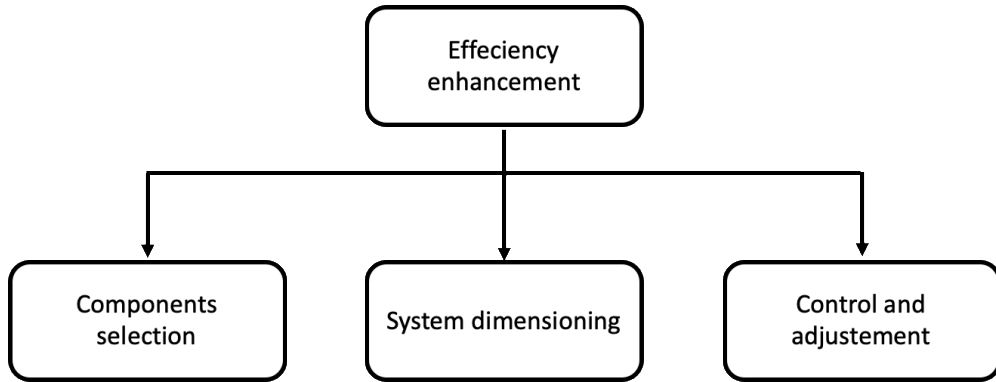

114

115 **Figure 2:** Scheme of the main of factors affecting efficiency enhancement opportunities in  
 116 WSS.

117 **2.1 Study area and description of the drinking water production system**

118

119 The province of Taza is located in the center North of Morocco and it is one of the 9  
 120 provinces of the region of Fez-Meknes with a population of roughly 530 000  
 121 inhabitants (Morocco 2014). The water treatment plant of Tahla provides a large  
 122 population of the province, mainly the urban areas. It is situated 60 km from the city  
 123 of Taza. The plant treats the raw water of the Bab Louta reservoir.

124 The production system consists of a pumping station SP0 for raw water, a water  
 125 treatment plant then another pumping station of SP3 to reach the city of Taza, which  
 126 is the chief town of the province.

127

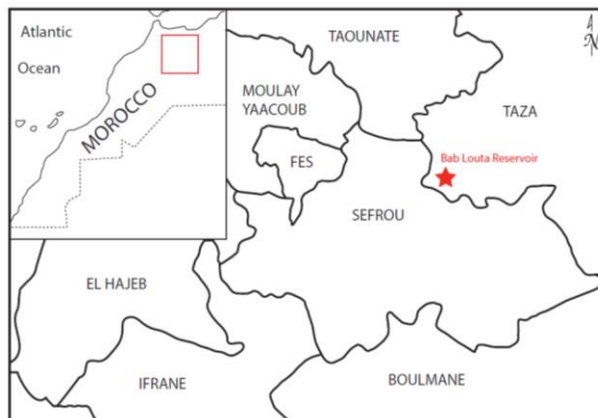

128

129 **Figure 3:** Location of the Bab Louta reservoir.

130 2.2 Description of the pumping station

131

132 The pumping station SP0 is located about 3km from the reservoir. It is responsible  
133 for overcoming the difference in altitude between the raw water intake and the water  
134 treatment plant. The water is taken by gravitation from the reservoir to the pumping  
135 station SP0 through a pipe of a nominal diameter (ND) of 700 mm which converge  
136 to a diameter of 500 mm just before reaching the SP0. Then, the water is pumped  
137 through a pipe of a nominal diameter of 600 mm to a tank destined to provide the  
138 water treatment plant with raw water, it is called RMC0 and having a capacity of  
139 1000 m<sup>3</sup>, which provides the water treatment plant with raw water through a pipe of  
140 a nominal diameter of 500 mm (ONEE 2019).

141

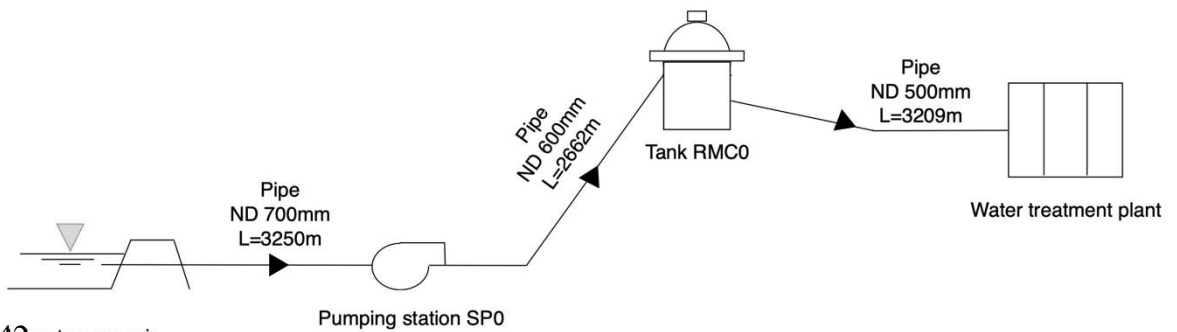

142 Bab Louta reservoir

143 **Figure 4:** A simplified example of a water treatment plant with water source (Bab Louta  
144 reservoir), pumping station (SP0) and one water tank (RMC0).

145 The pumping station, the object of the current study, is situated at an altitude of  
146 498.20 m and tank RMC0 is situated at an altitude of 737.80 m. SP0 consists of four  
147 pumps (Figure 5) with a flow of 457 m<sup>3</sup>/h each and a manometric pressure of 209 m.  
148 They are manufactured by the company HIDROTECAR powered by an electric  
149 motor which is manufactured by LEROY SOMER with a nominal power of 455 kW  
150 (ONEE, 2019).

151

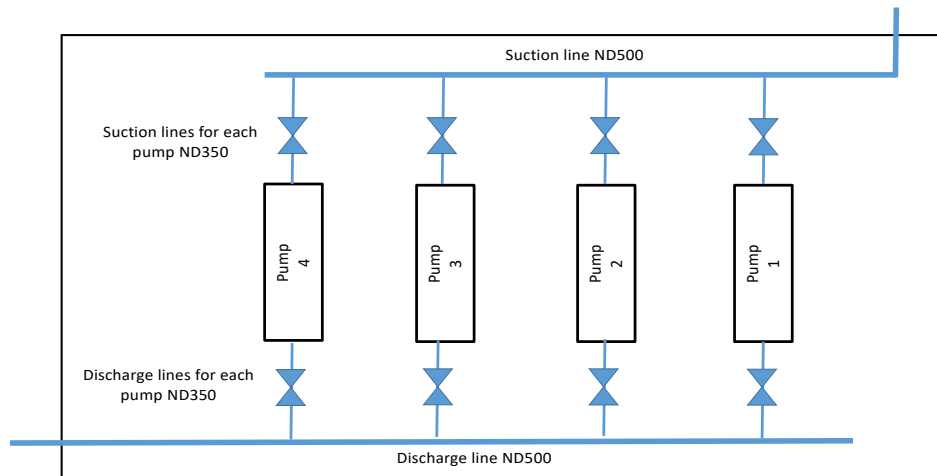

**Figure 5:** Hydromechanical scheme of the pumping station SP0.

### 2.3 Experimental procedure

To obtain a reliable model of our system, measurements of the key parameters influencing this system were conducted. These measurements were taken in the period between January 2015 and December 2018 daily for the parameters. Based on the above analysis, a total of eight factors affecting the efficiency of the pumping for drinking water production are selected, namely:

- P: the active energy consumed by the pumping station (measured by a wattmeter),
- Q: the reactive energy consumed by the pumping station (measured by a wattmeter),
- V: the daily produced volume (measured by an electromagnetic flowmeter),
- $\text{Cos}\varphi$ : the power factor,
- HMG1: the pump operating time “1”,
- HMG2: the pump operating time “2”,
- HMG3: the pump operating time “3”,
- HMG4: the pump operating time “4”.

173 This study investigates the impact of these several independents variables on the  
174 energy use of a drinking water production. The starting from these parameters, the  
175 principal component analysis is performed, and the comprehensive evaluation  
176 function equation and the regression equation can be obtained, respective.

177

## 178 2.4 Modelling

179

180 This study aimed to use Multiple Linear Regression (MLR) analysis to predict an  
181 output from a range of inputs. MLR model with multiple input variables can be  
182 expressed as follows (Longo et al., 2016):

183

$$184 \quad Y = \beta_0 + \beta_1 X_1 + \beta_2 X_2 + \dots + \beta_n X_n + \varepsilon \quad \text{Eq 1}$$

185

186 Where, Y is the output variable,  $\beta_i$  are the regression parameters,  $X_i$  are the input  
187 variables ( $i = 1, \dots, n$ ) and  $\varepsilon$  is the random error.

188

189 In order to assess the influence of the included parameters on the cubic meters ratio  
190 produced by the pumping station, the following parameters were considered: the  
191 active energy ( $E_P$ ), the reactive energy ( $E_Q$ ), the daily produced volume (V), the  
192 power factor ( $\text{Cos}\phi$ ), and the operating time of each pump ( $\text{HMG}_i$ ). Therefore, the  
193 principal parameter analysis is used to establish the evaluation model to achieve  
194 more objective and accurate analysis.

195 The effect of eight variables on the produced  $\text{Kwh/m}^3$  ratio was evaluated. Of  
196 note, 1388 experiments were conducted during 4 years. The set of analysis data is  
197 shown in Table 1.

198

199 **Table 1:** Problem characteristics

| Objective of the study     | The effect of the variables on the ratio<br>$\text{KWh/m}^3$ |
|----------------------------|--------------------------------------------------------------|
| Number of Variables        | 8                                                            |
| Number of experiments      | 1388                                                         |
| Number of the coefficients | 8                                                            |
| Number of responses        | 1                                                            |

200



201 **Table 2:** Measurements summary of the mean and standard deviation during period  
 202 2015 and 2018

|                    | $E_p$<br>(kWh) | $E_Q$<br>(kVar) | $\text{Cos}\phi$ | Production<br>( $\text{m}^3$ ) | HMG1<br>(m) | HMG2<br>(m) | HMG3<br>(m) | HMG4<br>(m) | Ratio<br>( $\text{kWh}/\text{m}^3$ ) |
|--------------------|----------------|-----------------|------------------|--------------------------------|-------------|-------------|-------------|-------------|--------------------------------------|
| Mean               | 14 837.47      | 8 339.58        | 0.87             | 18 181.40                      | 7.95        | 7.63        | 10.43       | 9.01        | 0.82                                 |
| Standard deviation | 9 158.63       | 8 529.85        | 0.05             | 5 081.13                       | 8.90        | 5.88        | 11.51       | 8.85        | 0.43                                 |

203

204 The descriptive statistics of the pumping station parameters under study are given  
 205 in Table 2. It provides a summary of the mean and standard deviation values of eight  
 206 measured parameters during 4 years. In this case, generally for each year, the mean  
 207 direct production about  $18181 \text{ m}^3$  related active energy of  $14837 \text{ kWh}$  with the  
 208 operating time of each pump ( $\text{HMG}_i$ ) to range between 8 and 10 m. Figure 6 displays  
 209 the real water consumption versus the month and year that is measured over four  
 210 years.

211

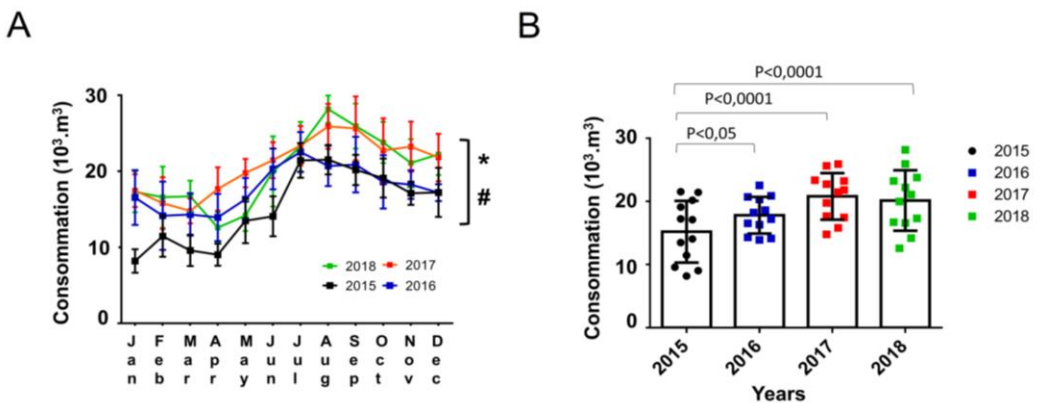

212

213 **Figure 6:** Representation the dataset collected of the variation of the consumptions of water  
 214 versus the months during period 2015 and 2018, (A) consumption variation through the  
 215 months (\*:  $P < 0.05$ , consumption variation through the years; #:  $P < 0.05$ , consumption  
 216 variation through the months), (B) consumption variation through the years ( $P < 0.05$  is  
 217 considered as statistically significant. Each point represents the consumption average of a  
 218 given month during the year).

219 The dataset collected of the water production across the year for each year from  
220 2015 to 2018 presented in figure 6-A, and it the trend shows that clearly  
221 demonstrates a higher production which reflects a higher consumption of water  
222 during the summer months in province of Taza. On the other hand, figure 6-B shows  
223 the evolution of the production through the years 2015 to 2018 and it has also the  
224 same increasing trend due to the continuous commissioning of new networks  
225 leading to a growing number of consumers.

226 It can be seen from Table 1, 2 and Figure 6 that the original data has large  
227 differences and many influencing factors, and it is difficult to conduct  
228 comprehensive and systematic analysis by conventional methods. Therefore, the  
229 MLR analysis method is used to establish the evaluation model to achieve more  
230 objective and accurate analysis.

231

### 232 3. Results and discussion

#### 233 3.1 Statistical interpretation

234

235 The correlation coefficients shown in a matrix (Table 3) are the results of statistical  
236 analyses for possible relationships between different parameters monitored. It was  
237 found that the studied variables are strongly correlated:

- 238 • The active energy consumed by the pumping station was dependent on the  
239 production, reactive energy, pumps operating hours (4;1), power factor  
240 ( $\text{Cos}\phi$ ), HMG2, and HMG3 respectively.
- 241 • The reactive energy consumed is highly was dependents on the production,  
242 active energy,  $\text{Cos}\phi$ , pumps operating hours (4;1;2;3) respectively.
- 243 •  $\text{Cos}\phi$  was dependent on the reactive energy, the production, active energy,  
244 pumps operating hours (4;1;3;2) respectively.
- 245 • Production was dependent on the active energy, the reactive energy pumps  
246 operating hours (4;1;2;3).

**Table 3:** Correlation matrix of water pumping station parameters

| Variable                    | Correlations (MATRIX CR without outliers)<br>Marked correlations are significant at P< 0.05000<br>N=1388 (Case wise deletion of missing data) |           |                 |                 |                 |                 |                 |                 |                 |                 |                 |
|-----------------------------|-----------------------------------------------------------------------------------------------------------------------------------------------|-----------|-----------------|-----------------|-----------------|-----------------|-----------------|-----------------|-----------------|-----------------|-----------------|
|                             | Means                                                                                                                                         | Std. Dev. | P               | Q               | Cos $\phi$      | Prod            | HMG1            | HMG2            | HMG3            | HMG4            | Ratio           |
| <b>P</b>                    | -0.022423                                                                                                                                     | 0.487229  | <b>1.000000</b> | 0.883071        | -0.190305       | 0.939746        | 0.333340        | 0.202424        | 0.169873        | 0.625872        | 0.463030        |
| <b>Q</b>                    | -0.027636                                                                                                                                     | 0.345041  | 0.883071        | <b>1.000000</b> | -0.585775       | 0.883506        | 0.332525        | 0.170169        | 0.170505        | 0.612964        | 0.298339        |
| <b>Cos<math>\phi</math></b> | 0.026763                                                                                                                                      | 0.761882  | -0.190305       | -0.585775       | <b>1.000000</b> | 0.316528        | -0.197066       | 0.024943        | -0.076562       | -0.271961       | 0.193819        |
| <b>prod</b>                 | 0.000741                                                                                                                                      | 0.973866  | 0.939746        | 0.883506        | -0.316528       | <b>1.000000</b> | 0.340309        | 0.222533        | 0.175107        | 0.613597        | 0.150594        |
| <b>HMG1</b>                 | -0.001400                                                                                                                                     | 1.002171  | 0.333340        | 0.332525        | -0.197066       | 0.340309        | <b>1.000000</b> | -0.164919       | -0.016355       | 0.236341        | 0.111733        |
| <b>HMG2</b>                 | -0.001865                                                                                                                                     | 0.998758  | 0.202424        | 0.170169        | 0.024943        | 0.222533        | -0.164919       | <b>1.000000</b> | -0.086627       | -0.141591       | 0.006575        |
| <b>HMG3</b>                 | 0.001362                                                                                                                                      | 1.003257  | 0.169873        | 0.170505        | -0.076562       | 0.175107        | -0.016355       | -0.086627       | <b>1.000000</b> | 0.074751        | 0.036371        |
| <b>HMG4</b>                 | -0.017745                                                                                                                                     | 0.708400  | 0.625872        | 0.612964        | -0.271961       | 0.613597        | 0.236341        | -0.141591       | 0.074751        | <b>1.000000</b> | 0.0257315       |
| <b>Ratio</b>                | -0.051987                                                                                                                                     | 0.197427  | 0.463030        | 0.298339        | 0.193819        | 0.150594        | 0.111733        | 0.006575        | 0.036371        | 0.0257315       | <b>1.000000</b> |

248 Therefore, it is necessary to comprehensively consider the efficiency of the  
 249 pumping unit, summarized in table 4. Table 4 lists the standardized regression  
 250 coefficients and regression coefficients of various factors on system efficiency. The  
 251 standardized regression coefficients can be used to construct the multiple  
 252 Regression equation. ‘T-test’ shows that the probability of rejection of truth for all  
 253 factors except the constant term is less than 0.05, indicating that the above  
 254 regression factors have significant effects on the dependent variables. Moreover, it  
 255 was concluded that the factors influencing the kWh/m<sup>3</sup> ratio in descending order  
 256 are:

- 257 • Ratio is positively correlated with the active energy consumed by the
- 258 pumps;
- 259 • Ratio is negatively correlated with the production;
- 260 • Ratio is positively correlated with Cosφ;
- 261 • Ratio is negatively correlated with the reactive energy consumed by the
- 262 pumps;
- 263 • Ratio is positively correlated with the operating hours of pumps 1 and 4.

264

265 **Table 4:** Regression summary for dependent variable

| N=1388           | Standardized regression coefficient (b*) | Standard error of b* | Regression coefficient (b) | Standard error of b | T-test (1379) |
|------------------|------------------------------------------|----------------------|----------------------------|---------------------|---------------|
| Intercept        |                                          |                      | -0.026073                  | 0.001608            | -16.2112      |
| Prod             | -2.52837                                 | 0.026164             | -0.512563                  | 0.005304            | -96.6366      |
| HMG <sub>1</sub> | 0.02116                                  | 0.008985             | 0.004168                   | 0.001770            | 2.3546        |
| HMG <sub>2</sub> | 0.01693                                  | 0.009327             | 0.003346                   | 0.001844            | 1.8150        |
| HMG <sub>3</sub> | -0.00080                                 | 0.008299             | -0.000157                  | 0.001633            | -0.0960       |
| HMG <sub>4</sub> | 0.04287                                  | 0.011275             | 0.011948                   | 0.003142            | 3.8023        |
| P                | 2.85701                                  | 0.043662             | 1.157669                   | 0.017692            | 65.4347       |
| Q                | -0.08315                                 | 0.040932             | -0.047577                  | 0.023421            | -2.0314       |
| Cosφ             | 0.09614                                  | 0.020445             | -0.024913                  | 0.005298            | -4.7023       |

266

267

268 The variance analysis of data in Table 5 has shown that eight variables are  
 269 significant which are Prod, HMG1, HMG2, HMG3, HMG4, P, Q and Cosφ. It can  
 270 be observed that the regression mean squares was superior to the residual mean  
 271 squares, the Fischer value is very high and the p-value is strictly tended towards  
 272 zero. Hence, the variance analysis result so all meet the regression requirements.  
 273 Besides as shown in Table 6 that, the R-square and Adjusted R-square statistic of  
 274 this model reaching 0.91 were found, which can reflect the good degree of influence  
 275 of various factors on model. From the error analysis, it can be seen that the value  
 276 standard error estimate is close to 0.05 (5%), thus error value is within a reasonable  
 277 interval, and the regression equation is statistically significant. In view of these  
 278 results, we can say that the parameters studied are highly variable in the research  
 279 area, thus, they also confirm the performance of the developed model.

280

281 **Table 5:** Analysis of Variance for MLR Model

| Effect     | Analysis of Variance; DV: Ratio |      |              |          |         |
|------------|---------------------------------|------|--------------|----------|---------|
|            | Sums of Squares                 | df   | Mean Squares | F        | p-value |
| Regression | 49.31283                        | 8    | 6.164104     | 1790.044 | 0.00    |
| Residual   | 4.74865                         | 1379 | 0.003444     |          |         |
| Total      | 54.06149                        |      |              |          |         |

282

283 **Table 6:** Statistical evaluation of model

| Statistic                  | Value        |
|----------------------------|--------------|
| R                          | 0.95507172   |
| R <sup>2</sup>             | 0.91216198   |
| Adjusted R <sup>2</sup>    | 0.9116524    |
| Fischer (8.1379)           | 1790         |
| p-value                    | 0.00         |
| Standard error of estimate | 0.0586817579 |

284

285 Based on this presented Statistical data analysis, the following set of the  
 286 parameters in the standardized regression equation are the data after standardized  
 287 processing is proposed in the final model expressed by the equation below:

288 
$$R_{\text{ratio}} = 2.85701 P - 2.52837 \text{ Prod} - 0.08315 Q + 0.09614 \text{ Cos}\phi + 0.02116 \text{ HMG1} +$$
  
 289 
$$0.01693 \text{ HMG2} - 0.00080 \text{ HMG3} + 0.04287 \text{ HMG4.} \quad \text{Eq 2}$$

290 Where, P-active energy consumed by the pumping station; Prod-production volume;  
291 Q-reactive energy consumed by the pumping station;  $\cos\phi$ -power factor;  $HMG_i$ -  
292 pump operating time ( $i=1;2;3,4$ ).

293 The regression equation obtained indicating that the above regression factors have  
294 significant effects on the dependent variables.

### 295 296 3.2 Technical Interpretations

297  
298 From this analysis, this study concluded that in order to improve the ratio per  
299 produced cubic meter, a reduction of the active energy consumed by the pumps  
300 should be considered. As the function point of the pumps is already set by the  
301 system characteristics, only active energy could be reduced by the improvement of  
302 the pumps efficiency.

303 The ratio is negatively correlated with production means; i.e., there is an  
304 economy of scale. It means the most the production increases the least the ratio is.

305 The operating hours of the pumps 1 and 4 are positively correlated, which means  
306 that more these pumps are used higher more the ratio is higher. Therefore, it is  
307 recommended to use the pump 3, and if there is an operation of renovation of the  
308 pumping station, it is recommended to start with upgrading the pumps 1 and 4. In  
309 the event of a new investment, the company can increase the capacity of the RMC0  
310 storage tank which, according to the model, will decrease the significantly the ration  
311 and also allows a load shifting to the off-peak hours.

312 A regression analysis was performed, which identified the quantitative  
313 relationships between input parameters and energy consumption ratio per cubic  
314 meter water, involved in a water pumping station. Using the variance analysis, the  
315 degree of confidence for the achieved results by the regression equation was  
316 determined, and the suitability of this equation at every point of the experimental  
317 field.

318 The model which was elaborated in this study, was successfully validated in the  
319 statistical analysis. It shows that the R-square statistic reaching 0.91, and a standard

320 error of estimate of 0.05. Thus, due to the lack of previous studies using multiple  
321 linear regression, we compared the results with a previous study involving five data-  
322 mining approaches (Kusiak et al., 2013).

323 This study had for objective to model the energy consumption in a comparable  
324 case of a wastewater pumping station that has 3 pumps that transfer the wastewater  
325 to a treatment plant. Although there are differences between the flow capacities and  
326 the pressure with drinking water supply facilities but the approach remains the  
327 same. The five data mining approaches are the multi-layer, perceptron, neural  
328 network (MLP), the boosted-tree (regression) algorithm (BT), the random-forest  
329 algorithm (RF), the support-vector machine (SVM), and the k-nearest neighbor  
330 algorithm. These approaches had all provided more than 90% of accuracy which is  
331 the case in the model of this study. The benefit of our method goes beyond the  
332 control methods used in most of the optimization approaches which only provide a  
333 method to operate the system in an efficient way but don't account for other factors  
334 such as the aging of the pumps, factors that are crucial when upgrading the system.

335

#### 336 **4. Conclusions**

337 A Linear multiple regression was conducted to assess and study the influence of  
338 multiple parameters on the energy consumption ratio per cubic meter water,  
339 involved in a water pumping station.

340 This unique approach has allowed evaluating the real response of the system  
341 relying on data that is measured over a 4 years period. Modelling the ratio will be a  
342 tool to take decisions on which pump should the work be done first. This method  
343 combined with a cash flow analysis, can help to take decisions on establishing  
344 priorities in case of renovations, to change the pumps 1 and 4 with more efficient  
345 pumps. To validate this model, we performed the performance test by determining  
346 the correlation R to show the link between the produced kWh/m<sup>3</sup> ratio and the  
347 following parameters such as active and reactive energies, the daily produced water  
348 volume, the power factor (Cosφ), and the operating time of each pump. the

349 regression coefficients, thus validating the models. The final model describes  
350 accurately the consumption per cubic meter produced with a R-square statistic  
351 reaching 0.91.

352 After this study, we retain that the developed model can predict the energy  
353 consumption ratio per cubic meter water, involved in a water pumping station.  
354 Thus, the model would be useful when the next renovation will be undertaken by  
355 the office which will conduct a replacement of the pumps in the year 2024, can  
356 more accurately and reasonably evaluate the efficiency pumping, according to the  
357 pumping unit model, motor power...

358 Besides that, the above findings demonstrate the potential of method for solving  
359 real-time pump scheduling problems in large water distribution systems with many  
360 pumps. However, this requires further work with other metaheuristic methods such  
361 as Genetic Algorithms before relevant conclusion can be made.

362

363 **Data availability.** The source data used for the illustrations of the cases are  
364 available upon request.

365 **Conflict of interest.** All authors declare no conflicts of interest in this paper.

366

367

368

369

370

371

372

373

374

375



376 **References**

- 377 Adamowski, J., Fung Chan, H., Prasher, S. O., Ozga-Zielinski, B., Sliusarieva, A.:  
378 Comparison of multiple linear and nonlinear regression, autoregressive integrated  
379 moving average, artificial neural network, and wavelet artificial neural network methods  
380 for urban water demand forecasting in Montreal, Canada WATER RESOURCES  
381 RESEARCH, VOL. 48, W01528, doi:10.1029/2010WR009945, 2012.
- 382 Carravetta, A.; Giugni, M.; Malavasi, S.: Application of Innovative Technologies for Active  
383 Control and Energy Efficiency in Water Supply Systems. *Water*, 12, 3278.  
384 <https://doi.org/10.3390/w12113278>, 2020.
- 385 Coelho, B. and Andrade-Campos, A.: Efficiency achievement in water supply systems-A  
386 review, *Renewable and Sustainable Energy Reviews*, 30, C, 59-84, 2014.
- 387 Durmus, K. E., Alptekin, Y., Suleyman Yigit, K., Kilic, F. C., Salih Eren, A., Cenk Celik.:  
388 Energy efficiency in pumps, *Energy Conversion and Management*, 49, 6, 1662-1673,  
389 2008.
- 390 EIA, 2019.: *International Energy Outlook 2019*, <https://www.eia.gov/outlooks/ieo>, 2019.
- 391 Fallside, F., Perry, P.F.: Hierarchical optimization of a water supply network, *Proceedings of*  
392 *the Institution of Electrical Engineers*, 122, 2, 202-208, 1975.
- 393 Giustolisi, O., Laucelli, D., Berardi, L.: Operational optimization: water losses versus energy  
394 costs, *J. Hydraulic Eng. ASCE.*, 139, 4, 410-423, 2012.
- 395 Helena, M-J., Nargiz, S., Dragan, S.: Lost in optimisation of water distribution systems? A  
396 literature review of system operation, *Environmental Modelling & Software*, 93, 210-  
397 251, <https://doi.org/10.1016/j.envsoft.2017.02.009>, 2017.
- 398 Longo, S-A., Benedetto, M-B., Michael, C., Antonio, C., Andreas, F., Francesco, L., Juan,  
399 M. M-I., Miguel, S., Ana, H. A.: Monitoring and diagnosis of energy consumption in  
400 wastewater treatment plants. A state of the art and proposals for improvement, *Applied*  
401 *Energy*, Elsevier, 179, C, 1251-1268, 2016.
- 402 Luna, T., Ribau, J., Figueiredo, D., Alves. R: Improving energy efficiency in water supply  
403 systems with pump scheduling optimization, *Journal of Cleaner Production* 213, 342-  
404 356, 2019.

405 Kusiak, A., Zeng, Y., Zhang, Z.: Modeling and analysis of pumps in a wastewater treatment  
406 plant: A data-mining approach, *Engineering Applications of Artificial Intelligence.*, 26,  
407 7, 1643-1651, 2013.

408 Moreira, D. F., Ramos, H. M.: Energy Cost Optimization in a Water Supply System Case  
409 Study, *Journal of Energy*, vol. 2013, Article ID 620698, 9 pages,  
410 <https://doi.org/10.1155/2013/620698>, 2013.

411 Morocco, 2014.: High Commission for Planning (Morocco). Morocco Population and  
412 Housing Census 2014, [http://ghdx.healthdata.org/record/morocco-population-and-](http://ghdx.healthdata.org/record/morocco-population-and-housing-census)  
413 [housing-census](http://ghdx.healthdata.org/record/morocco-population-and-housing-census), 2014.

414 Nogueira, V., Mateus, R., Perrella, B., José, A.: Energy and hydraulic efficiency in  
415 conventional water supply systems, *Renewable and Sustainable Energy Reviews*, 30, C,  
416 701-714, 2014.

417 ONEE- “National Office of Electricity and Drinking Water Morocco” -(2019).: Exploitation  
418 report, 2019.

419 Ostfeld, A. and Tubaltzev, A.: Ant Colony Optimization for Least Cost Design and  
420 Operation of Pumping and Operation of Pumping Water Distribution Systems. *Journal of*  
421 *Water Resources Planning and Management*, 134, 107-118.  
422 [http://dx.doi.org/10.1061/\(ASCE\)0733-9496\(2008\)134:2\(107\)](http://dx.doi.org/10.1061/(ASCE)0733-9496(2008)134:2(107)), 2008.

423 Plappally, A.K., Lienhard, J.H. V.: Energy requirements for water production, treatment,  
424 end use, reclamation, and disposal *Renewable and Sustainable Energy Reviews* 16,  
425 4818–4848, 2012.

426 Puleo, V., Morley, M., Freni, G., Savić, D., Multi-stage linear programming optimization for  
427 pump scheduling *Procedia Engineering*, 70, 1378-1385, 2014.

428 Rothausen, S., Conway, D. Greenhouse-gas emissions from energy use in the water sector.  
429 *Nature Clim Change* 1, 210–219, <https://doi.org/10.1038/nclimate1147>, 2011.

430 Shankar, A., Umashankar, V. K., Paramasivam, S., Norbert., S. H. : A comprehensive  
431 review on energy efficiency enhancement initiatives in centrifugal pumping system,  
432 *Applied Energy*, Elsevier, 181, C, 495-513, 2016.

433 Sarbu, I.: A Study of Energy Optimisation of Urban Water Distribution Systems Using  
434 Potential Elements. *Water*, 8, 593, 1-19. <https://doi.org/10.3390/w8120593>, 2016.

435 UN-Water 2020 World Water Development Report,  
436 <https://www.unwater.org/publications/world-water-development-report-2020>, 2020.

437 Vilanova, N., Ricardo, M., Balestieri, P., Antônio, J. : Energy and hydraulic efficiency in  
438 conventional water supply systems, *Renewable and Sustainable Energy Reviews*,  
439 Elsevier, 30, C, 701-714, 2014.

440 Wu, P., Lai, Z., Wu, D., Wang, L.: Optimization research of parallel pump system for  
441 improving energy efficiency, *Journal of Water Resources Planning and Management*,  
442 141, 8, 2015.

443 Zhou, Y., Lee, E. W. M., Wong, L. T., & Mui, K. W.: Environmental evaluation of pump  
444 replacement period in water supply systems of buildings. *Journal of Building*  
445 *Engineering*, 40, 102750, 2021.
