# Supplementary material for: Modeling of pump performance in a water pumping plant
Source: Copernicus journal article supplement (doi:10.5194/dwes-2021-16), 2022-01-20
Supplement: Supplementary file [file dwes-2021-16-RC4-supplement.pdf]

used for definition of replacement strategies. What is meant with 'limited renovation'? All this is not explained in the paper. English spelling: 'First' with capital 'F'?

40 Pumps account for 80% to 90% of the energy consumption (Sarbu, 2016). By achieving  
41 energy efficiency improvements measures, we can reduce the consumption by at least 25%  
42 (Moreira, 2013). Very few studies were conducted before to simulate the real behaviour of  
43 pumping systems and evaluate the influence of parameters such as the aging of the  
44 components, which can induce a reduction of the pumps performance for up to 12% (Kaya,  
45 2008).

SC03: It is awkward to generalize any percentages referred from the literature because these normally emerge from some cases i.e. under specific conditions, which are not elaborated here. The pump ageing is interesting aspect, but it is not defined in the paper. How do we measure/monitor it? Was this included in the objective?

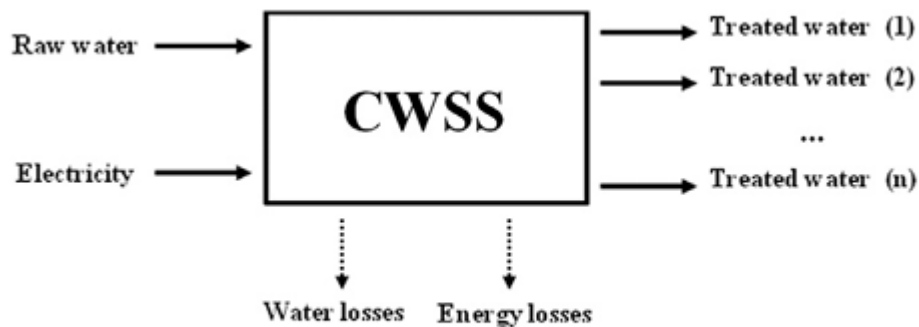

**Figure 1:** Energy and Hydraulic flows in a WSS

SC04: The drawing layout is confusing. It is mostly close to a water treatment plant. CWSS abbreviation does not stand because that one would also include transport and distribution infrastructure. On the other hand, the water and energy losses are indicated. Where they are originating from?

104 **1.4. Modelling:**

105 The aim of this study is to use Multiple linear regression, a wide popular technique to  
106 predict an output from a range of inputs. MLP model with multiple input variables can be  
107 expressed as following (Longo, 2016):

SC05: Why talking about the aim of the study in this place? What is the difference between the aim and objective? What is the exact meaning of MLP (should it be MLR?). English spelling: should be (' a widely popular technique'; 'Multiple linear regression' all words should start with capitals.

117

**Table 1:** Problem characteristics

| Objective of the study     | The effects |
|----------------------------|-------------|
| Number of Variables        | 8           |
| Number of experiments      | 1388        |
| Number of the coefficients | 8           |
| Number of responses        | 1           |

118

119 The table above summaries the objective of the study evaluating the effects of 8  
 120 variables on the response, which is the ratio of Kwh/m<sup>3</sup> produced. To get enough data, 1388  
 121 experiments were conducted during a period of 4 years.

SC06: The objective spelled in line 14 was to produce a model. Here it states that it is about ‘the effects’ (of what?). The table is confusing i.e. needs more elaboration: the difference between the variables and coefficients, what is meant with number of responses, etc.

125

In the graphs below the distribution of the parameters is represented.

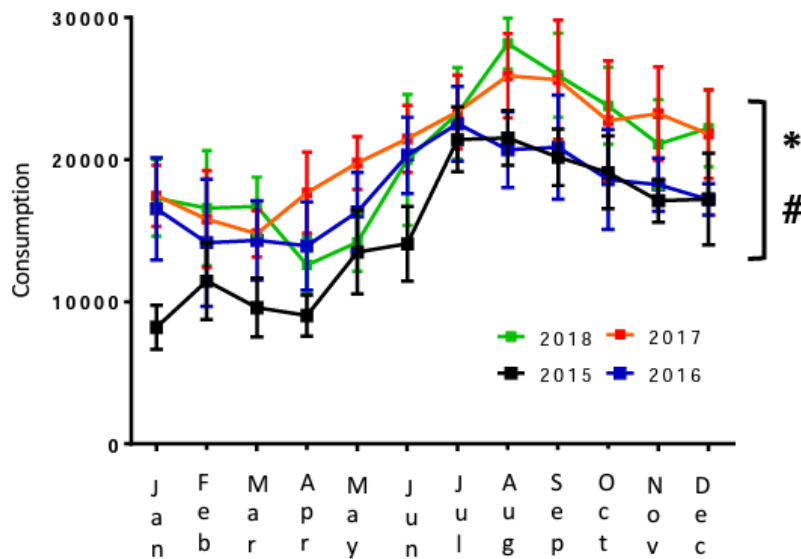

126

127 **Figure 6:** Representation of the variation of the consumptions through the years

SC07: Units are missing on Y-axis. Also, what is meant with ‘Consumption’? Looking to the system layout in Fig. 4, it is more about a ‘Production’ in fact.

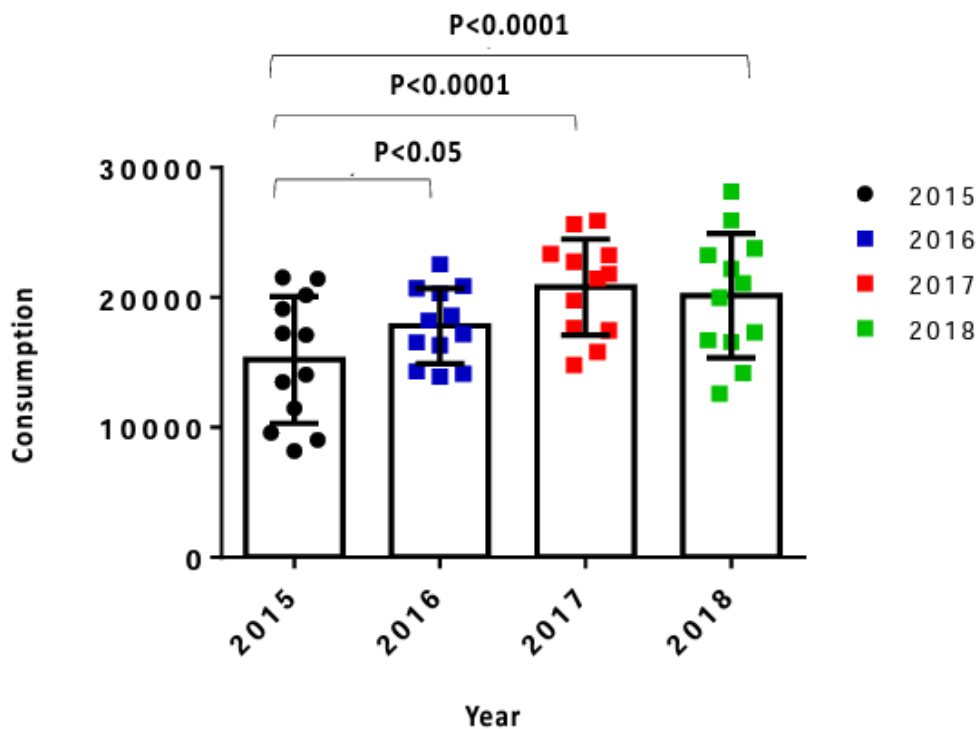

**Figure 7:** Box plots of the consumptions through the years

SC08: The same comment as SC07. Moreover, the meaning of P is not explained.

148 From the table of the regression summary (Table 4) it is conclude that the factors  
 149 influencing the ratio in a descending order are:

- 150 • Ratio is positively correlated with the active energy consumed by the pumps;
- 151 • Ratio is negatively correlated with the production;
- 152 • Ratio is positively correlated with the CosPhi;
- 153 • Ratio is negatively correlated with the reactive energy consumed by the  
 154 pumps;
- 155 • Ratio is positively correlated with the operating hours of the pumps 1 and 4.

156 **Table 4:** Regression summary for dependent variable

| N=1388           | b*       | Std. Err. of b* | b         | Std. Err. of b | t (1379) |
|------------------|----------|-----------------|-----------|----------------|----------|
| Intercept        |          |                 | -0.026073 | 0.001608       | -16.2112 |
| Prod             | -2.52837 | 0.026164        | -0.512563 | 0.005304       | -96.6366 |
| HMG <sub>1</sub> | 0.02116  | 0.008985        | 0.004168  | 0.001770       | 2.3546   |
| HMG <sub>2</sub> | 0.01693  | 0.009327        | 0.003346  | 0.001844       | 1.8150   |
| HMG <sub>3</sub> | -0.00080 | 0.008299        | -0.000157 | 0.001633       | -0.0960  |
| HMG <sub>4</sub> | 0.04287  | 0.011275        | 0.011948  | 0.003142       | 3.8023   |
| E <sub>p</sub>   | 2.85701  | 0.043662        | 1.157669  | 0.017692       | 65.4347  |
| E <sub>q</sub>   | -0.08315 | 0.040932        | -0.047577 | 0.023421       | -2.0314  |
| Cos Phi          | 0.09614  | 0.020445        | -0.024913 | 0.005298       | -4.7023  |

SC09: There is a repetitive mentioning of a 'ratio' but no explanation which one.

SC10: To which extent is the statistical analysis giving surprising or logical correlations? Could the relations be known even without doing it? The bullets only read the table, without real discussions.

181           The operating hours of the pumps 1 and 4 are positively correlated, which means that  
182   the more we use them the higher the ratio gets, so we'd better use the other groups,  
183   especially the pump 3, and if there is an operation of renovation of the pumping station, it is  
184   recommended to start with changing the pumps 1 and 4.

SC11: The pumping station has four identical units. So obviously, shuffling their operation schedules does not interfere with the target hydraulic performance while it is 'healthy' for the lifetime of each pump. This is a common engineering logic. I do not understand what more we learn from the results in the tables in order to operate the pumps differently? The interpretation of the results is very superficial.

185           The model which is elaborated in this study has a standard error of estimate of 0.05 and  
186   due to the lack of previous studies using multiple linear regression, we compared the results  
187   with a study involving five data-mining approaches (Kusiak, 2013). The five data mining  
188   approaches are the multi-layer, perceptron, neural network (MLP), the boosted-tree  
189   (regression) algorithm (BT), the random-forest algorithm (RF), the support-vector machine  
190   (SVM), and the k-nearest neighbour algorithm. These approaches had all provided more  
191   than 90% of accuracy which is the case in the model of this study.

SC12: I see no evidence of any comparison in the paper. How can I trust?

196           This unique approach has allowed determining the real response of the system relying  
197   on data that is measured over a 4 years period. Modelling the ratio will be a tool to take  
198   decisions on which pump should the work be done first. This method combined with a cash  
199   flow analysis, can help to take decisions on establishing priorities in case of renovations, to  
200   change the pumps 1 and 4 with more efficient pumps.

SC13: What is 'unique'? What is meant with 'real response'? How do we really benefit from the measurements done to improve the operation of the pumps?

SC14: The suggested financial considerations should already be added to improve the substance of the paper.

SC15: I do still do not understand the rationale to replace 'the pumps 1 and 4 with more efficient pumps'. Why they are currently worse than pumps 2 and 3 when they are all identical. Again, too superficial discussion of the results.
